# Supplementary material for: Spatiotemporal variation in the specific surface area of surface snow measured along the traverse route from the coast to Dome Fuji, Antarctica
Source: Copernicus journal article supplement (doi:10.5194/egusphere-2024-769), 2024-03-25
Supplement: Supplementary file 1 [file egusphere-2024-769-supplement.pdf]

# **Supplementary information for “Spatiotemporal variation in the specific surface area of surface snow measured along the traverse route from the coast to Dome Fuji, Antarctica”**

5 **Ryo Inoue<sup>1,2</sup>, Teruo Aoki<sup>2</sup>, Shuji Fujita<sup>1,2</sup>, Shun Tsutaki<sup>1,2</sup>, Hideaki Motoyama<sup>1,2</sup>, Fumio Nakazawa<sup>1,2</sup>, and Kenji Kawamura<sup>1,2,3</sup>**

<sup>1</sup> Graduate Institute for Advanced Studies, SOKENDAI, Department of Advanced Studies, Tokyo 190–8518, Japan

10 <sup>2</sup> National Institute of Polar Research, Tokyo 190–8518, Japan

<sup>3</sup> Japan Agency for Marine–Earth Science and Technology, Kanagawa 237–0061, Japan

## Contents of this file

- 15
- Supplementary Note S1
  - Supplementary Table S1
  - Supplementary Figures S1–S5
  - References

## 20 **Note S1: Calibration of the reflected light intensity into reflectance**

A handheld integrating sphere snow grain sizer (HISSGraS) measures the near-infrared (NIR) reflectance of snow using an integrating sphere. The InGaAs photodiode, attached inside the integrating sphere, collects the light reflected by a snow sample and outputs a light intensity signal. The signal is then converted to reflectance ( $R$ ) using a calibration curve derived from measurements on six reflectance standards (5–99 %). However, the  
25 calibration curve is sensitive to the instrument temperature due to the temperature sensitivity of the laser-diode emission. We describe method for calibrating the temperature-dependent output signal into  $R$ , applicable to the temperature range for our study ( $-35$  to  $5$  °C), following Aoki et al. (2023).

For the temperature correction of the output signal, HISSGraS simultaneously records the temperature near the laser diode along with the output signal of light intensity. We first established the relationship between  
30 the laser-diode temperature and the HISSGraS output signal for the six reflectance standards (5–99 %). Figure S1a shows 112 output signals for each standard, which were measured at temperatures between  $-35$  and  $5$  °C during our observation campaign in Antarctica from 12 November 2021 to 31 January 2022. These data show a temperature sensitivity of approximately  $-1$  %  $\text{K}^{-1}$  and can be fitted by cubic curves. Then, we obtain output signals at arbitrary temperatures using the cubic curves. Figure S1b shows output signals at  $0$ ,  $-10$ ,  $-20$ , and  
35  $-30$  °C, plotted against the reflectance of standards. Obtaining a fitting curve to the output signals using quadratic functions (solid line in Fig. S1b), we can calibrate the output signal into  $R$  at arbitrary temperatures. Here, the coefficients of the quadratic functions are parameterized as cubic functions of temperature with relative standard errors of  $0.1$  %, providing the following calibration formula:

$$40 \quad R = aX^2 + bX + c, \quad (\text{S1})$$

$$a = -7.2 \times 10^{-12} T^3 - 6.7 \times 10^{-10} T^2 - 3.41 \times 10^{-8} T - 1.753 \times 10^{-6}, \quad (\text{S2})$$

$$b = 3.8 \times 10^{-8} T^3 + 4.3 \times 10^{-6} T^2 + 2.95 \times 10^{-4} T + 3.091 \times 10^{-2}, \quad (\text{S3})$$

$$c = -9.5 \times 10^{-5} T^3 - 4.0 \times 10^{-3} T^2 - 5 \times 10^{-3} T - 10.97. \quad (\text{S4})$$

45 Here,  $X$  represents the output signal (count),  $a$ ,  $b$ , and  $c$  are regression coefficients, and  $T$  represents laser-diode temperature (°C). The  $R$  derived from this formula overlaps the fitting curves in Fig. S1b.

The temperature correction reduces errors in SSA measurements, which are caused by temperature changes during an observation activity due to the laser-diode heating by repeated light emissions or the insufficient adjustment of instrument temperature to ambient temperature. Moreover, the temperature correction  
50 eliminates the need for adjusting the laser-diode temperature to ambient temperature before measurement, which typically requires 30 minutes (Aoki et al., 2023), and measuring six reflectance standards necessarily before (or after) all measurement activities.

**Table S1:** In situ observation sites for snow SSA (or  $r_{\text{eff}}$ ) in the top few meters of firn in Antarctica.

| Area                          | Latitude<br>(°) | Longitude<br>(°) <sup>a</sup> | Number of observation<br>spots                            | Sample / Depth            | Instrument                                  | Reference                                     |
|-------------------------------|-----------------|-------------------------------|-----------------------------------------------------------|---------------------------|---------------------------------------------|-----------------------------------------------|
| Dronning Maud Land            | -76 to -71      | -7 to 20                      | 3 spots                                                   | Core / 10–12 m            | X-ray CT                                    | Linow et al. (2012)                           |
| Kohnen Station                | 75.0            | 0.1                           | 46 m transect                                             | Near-surface firn / 1.1 m | Snow Micro Pen                              | Proksch et al. (2015)                         |
| Kohnen Station                | 75.0            | 0.1                           | (1) 1 spot                                                | (1) Surface snow          | (1) Albedometer                             | Carlsen et al. (2017)                         |
|                               |                 |                               | (2) Multi spots along a<br>100 m transect                 | (2) Surface snow          | (2) IceCube                                 |                                               |
| Dome Fuji                     | -78 to -77      | 39–41                         | 4 spots                                                   | Core / 10 m               | Line scanner of NIR<br>reflectance          | Inoue et al. (2024)                           |
| S16 – Dome Fuji               | -78 to -69      | 39–45                         | 2139 spots along a 1051<br>km traverse route <sup>b</sup> | Surface snow              | HISSGraS                                    | This study                                    |
| Inland plateau of Wilkes Land | -80 to -75      | 106–126                       | 7 spots                                                   | Core or borehole / 4–18 m | ASSSAP <sup>c</sup> or POSSSUM <sup>d</sup> | Picard et al. (2022)                          |
| Dome C                        | -75.1           | 123.3                         | 1 spot                                                    | Pit wall / 3 m            | NIR photography                             | Brucker et al. (2011)                         |
| Dome C                        | -75.1           | 123.3                         | 2 spots                                                   | Borehole / 8 m            | POSSSUM                                     | Picard et al. (2014)                          |
| Dome C                        | -75.1           | 123.3                         | 1 spot                                                    | Surface hoar              | Ice Cube                                    | Gallet et al. (2014)                          |
| Dome C                        | -75.1           | 123.3                         | (1) 1 spot                                                | (1) Surface snow          | (1) Albedometer                             | Libois et al. (2014; 2015)                    |
|                               |                 |                               | (2) 632 spots within an<br>area of ~ 1000 m <sup>2</sup>  | (2) Surface snow          | (2) ASSSAP                                  |                                               |
|                               |                 |                               | (3) 130 spots with > 5 m<br>intervals                     | (3) Pit wall / 0.5 m      | (3) ASSSAP                                  |                                               |
| Dome C                        | -75.1           | 123.3                         | 10 spots                                                  | Core / 11–80 m            | POSSSUM                                     | Leduc-Leballeur et al.<br>(2015)              |
| Dome C                        | -75.1           | 123.3                         | 1 spot                                                    | Surface snow              | Albedometer                                 | Picard et al. (2016)                          |
| Point Barnola                 | -75.7           | 123.3                         | 1 spot                                                    | Pit sample / 3 m          | X-ray CT                                    | Calonne et al. (2017)                         |
| Dumont D'Urville – Dome C     | -76 to -68      | 123–139                       | (1) 8 spots along a ~ 1200<br>km traverse route           | Pit sample / 0.7 m        | Ice Cube                                    | Gallet et al. (2011)                          |
|                               |                 |                               | (2) 13 spots at Dome C                                    |                           |                                             |                                               |
| Adélie Land                   | -70 to -67      | 134–142                       | 11 spots                                                  | Core / 3–9 m              | ASSSAP                                      | Picard et al. (2022)                          |
| Adélie Coast                  | -66.7           | 139.8                         | 2 spots                                                   | Surface snow              | Albedometer                                 | Arioli et al. (2023)                          |
| Hercules Dome                 | -86             | -105                          | 1 spot                                                    | Core / 15 m               | X-ray CT                                    | Hörhold et al. (2009);<br>Linow et al. (2012) |
| Aboa Station                  | -73.1           | -13.4                         | 8 spots                                                   | Surface snow              | Radiometer                                  | Pirazzini et al. (2015)                       |

<sup>a</sup> Listed in the ascending order of longitude. <sup>b</sup> Measurements were missed at 11 surfaces out of 215 sets of 10 different surface measurements. <sup>c</sup> Alpine Snow Specific Surface Area Profiler (Libois et al., 2015). <sup>d</sup> Profiler Of Snow Specific Surface area Using shortwave infrared reflectance Measurement (Arnaud et al., 2011).

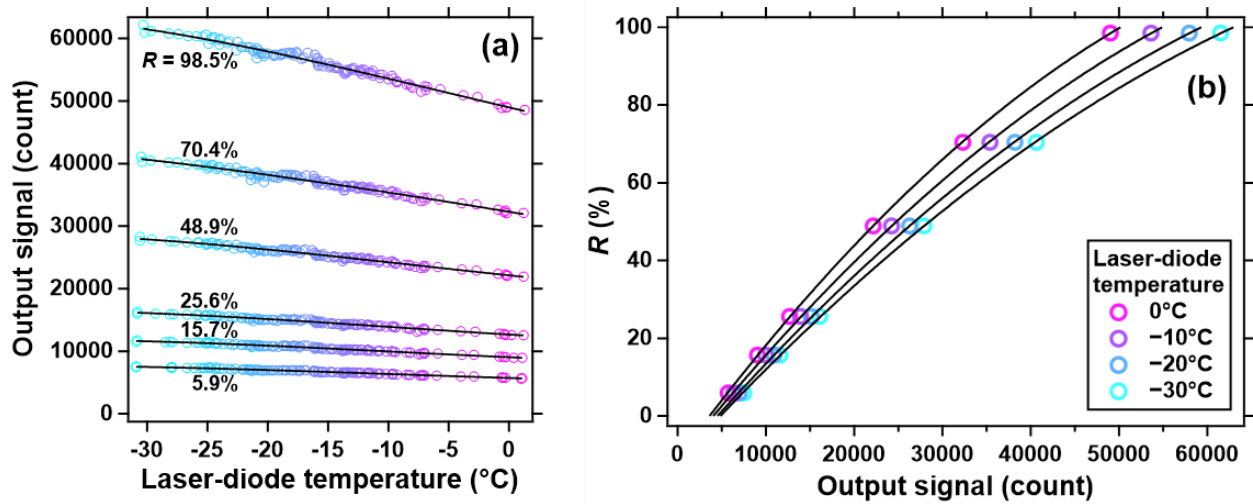

**Figure S1:** Calibration of the HISSGraS output signal (reflected light intensity) into reflectance  $R$ . (a) Relationship between laser-diode temperature and the HISSGraS output signal for six reflectance standards (5–60 99 %). The output signals were measured during our observation campaign in Antarctica from 12 November 2021 to 31 January 2022. Marker colors indicate laser-diode temperature. Data are fitted using cubic functions (black lines). (b) Output signals calculated from the cubic curves in (a) at 0, -10, -20, and -30 °C, plotted against the reflectance of standards. Data are fitted using quadratic functions (black lines).

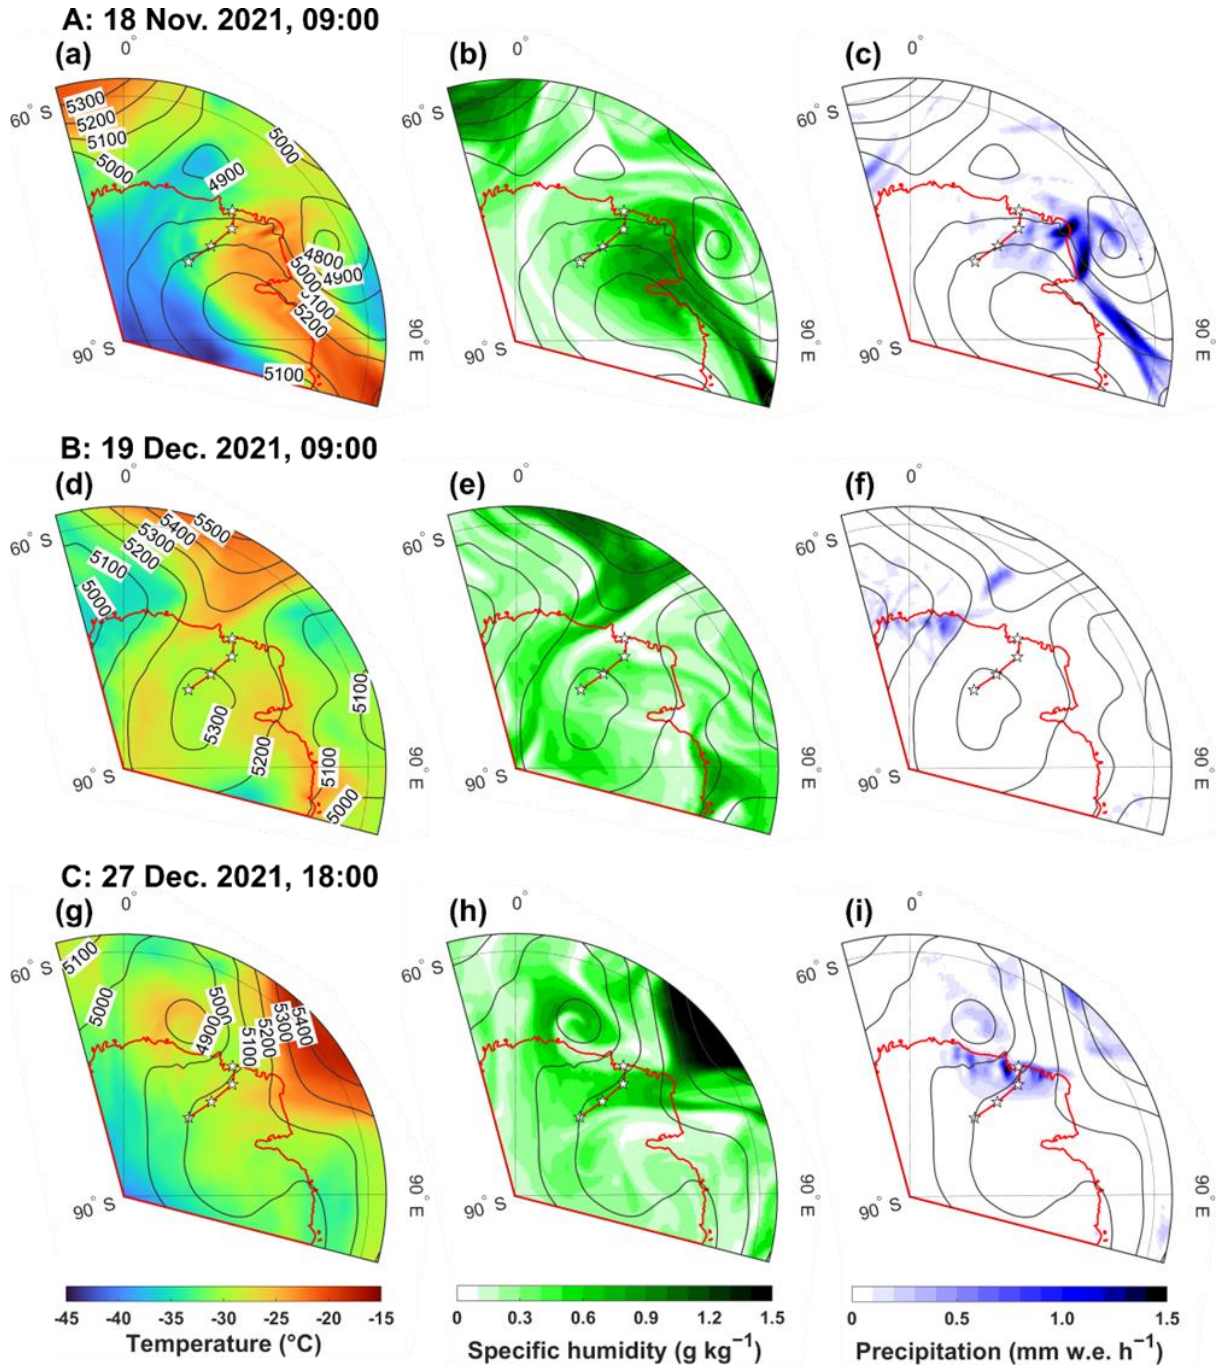

**Figure S2:** Meteorological fields during the events A, B, and C indicated in Fig. 3 and 4 in the main text, derived from the ERA5 reanalysis, the 5th generation global climate reanalysis conducted by the European Centre for Medium-Range Weather Forecasts (Hersbach et al., 2020). The red line in each panel indicates the Antarctic coastline and the traverse route between S16 and Dome Fuji. Stars indicate major sites along the traverse route mentioned in the main text. Contours indicate the 500 hPa geopotential height (m). (a) Temperature at 500 hPa geopotential height, (b) specific humidity at 500 hPa geopotential height, and (c) precipitation at 9:00 LT on 18 November 2021, when we experienced a severe blizzard at Mizuho (second star from the coast). A blocking ridge intrudes from Princess Elizabeth Land toward Dome Fuji, transporting warm, moist air and precipitation to the traverse route along the western side of the blocking ridge. The space between the isoline of the 500 hPa geopotential height is narrow on Mizuho, and the total precipitation during the blizzard event from 17 to 19 November is 10 mm w.e. at Mizuho. (d, e, f) The same as (a, b, c) but for 9:00 LT on 19 December 2021, after which melt-freeze crusts with a low SSA ( $\sim 7 \text{ m}^2 \text{ kg}^{-1}$ ) were observed at the surface of S16 (first star from the coast). S16 is located under high atmospheric pressure with low specific humidity and no precipitation. (g, h, i) The same as (a, b, c) but for 18:00 LT on 27 December 2021, when heavy snowfall was observed in the middle area of the traverse route. Air masses with high specific humidities are advected from low latitudes along the east side of a cyclone on the coast of east Dronning Maud Land (DML), and the space between the isolines of the 500 hPa geopotential height expands toward the interior around the traverse route.

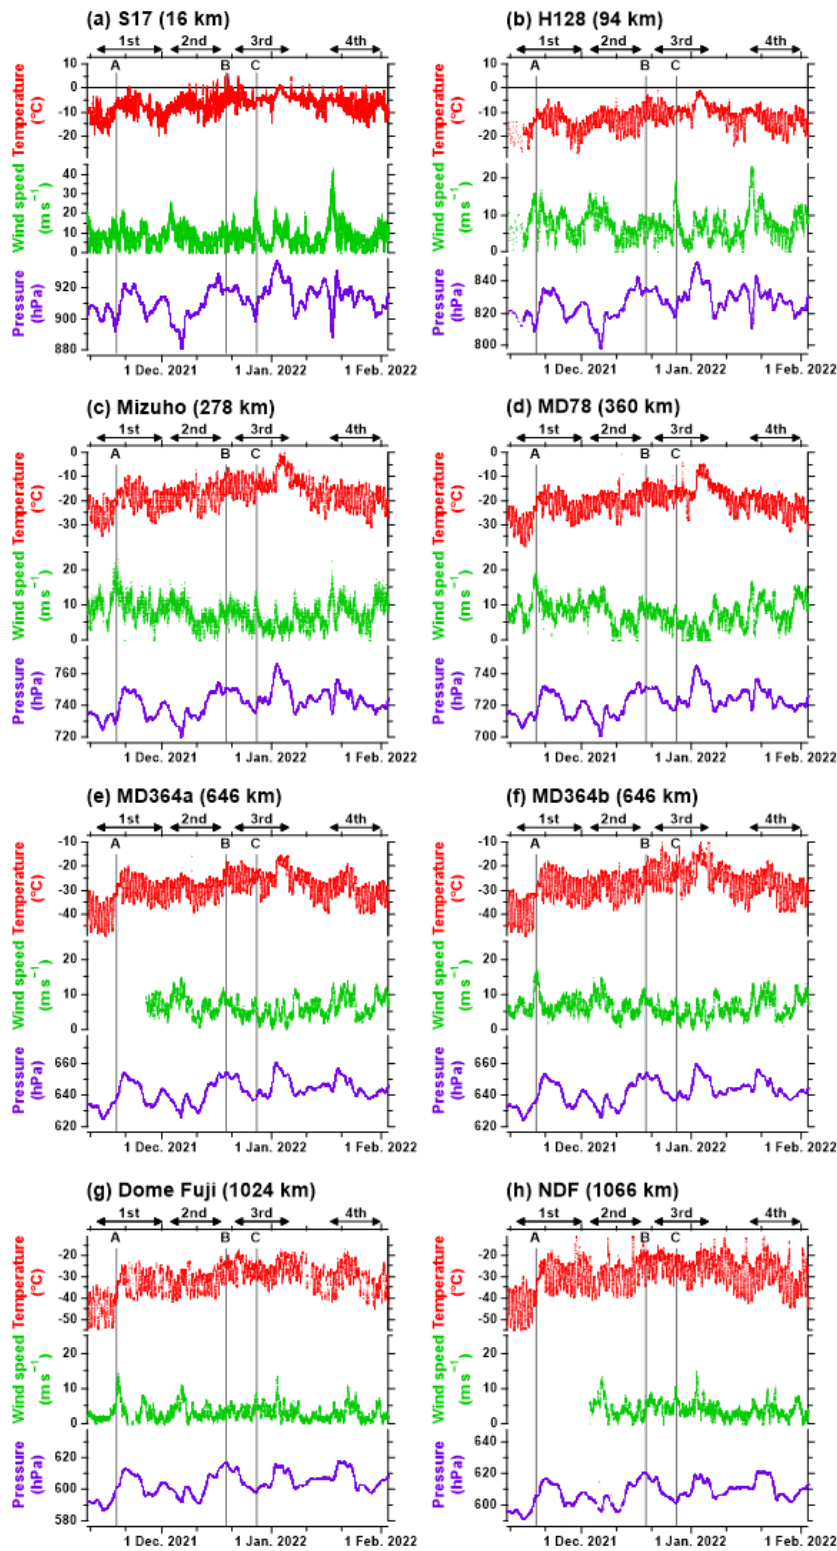

**Figure S3:** Air temperature, wind speed, and air pressure between 12 November 2021 and 31 January 2022, recorded at (a) S17, (b) H128, (c) Mizuho, (d) MD78, (e) MD364a, (f) MD364b, (g) Dome Fuji, and (h) NDF AWSs. Distances from the coast are shown in parentheses after the AWS names. The double-headed arrows above each panel represent periods for the four traverses. The vertical lines and capital alphabets A, B, and C in each panel indicate meteorological events whose ERA5 meteorological fields in DML are presented in Fig. S2.

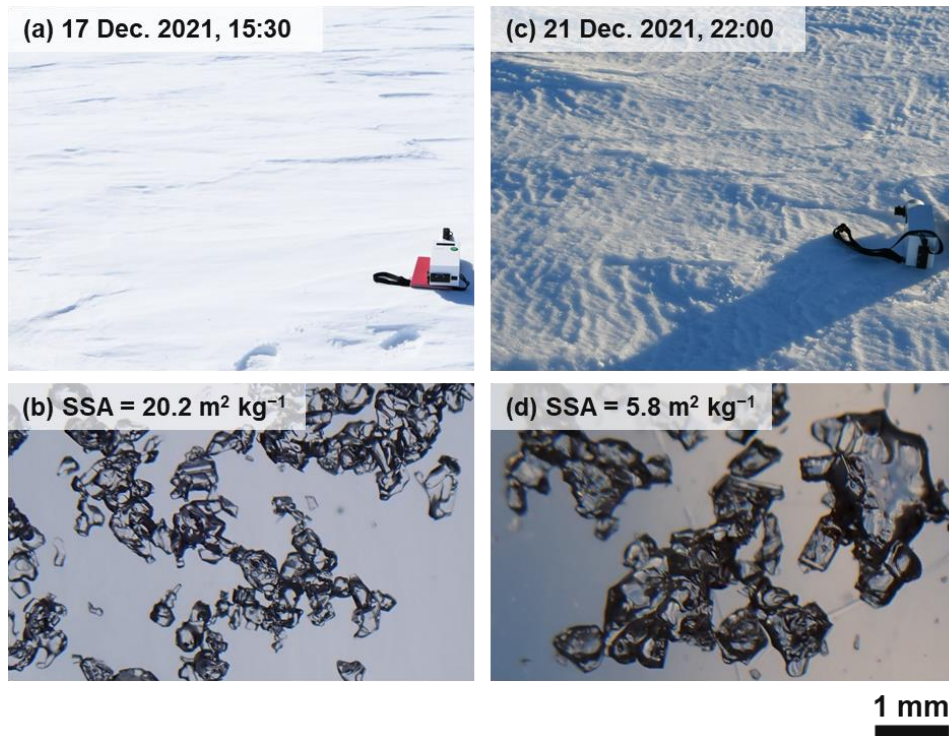

95 **Figure S4:** Photographs of the surface at S16 with HISSGraS ( $0.3 \times 0.1 \times 0.1 \text{ m}^3$  volume) on the surface and snow crystals (a, b) before event B (indicated in Fig. 3 and 4 in the main text) at 15:30 LT on 17 December 2021 and (c, d) after event B at 22:00 LT on 21 December 2021. The surface becomes rough, with melt-freeze crusts appearing between the period.



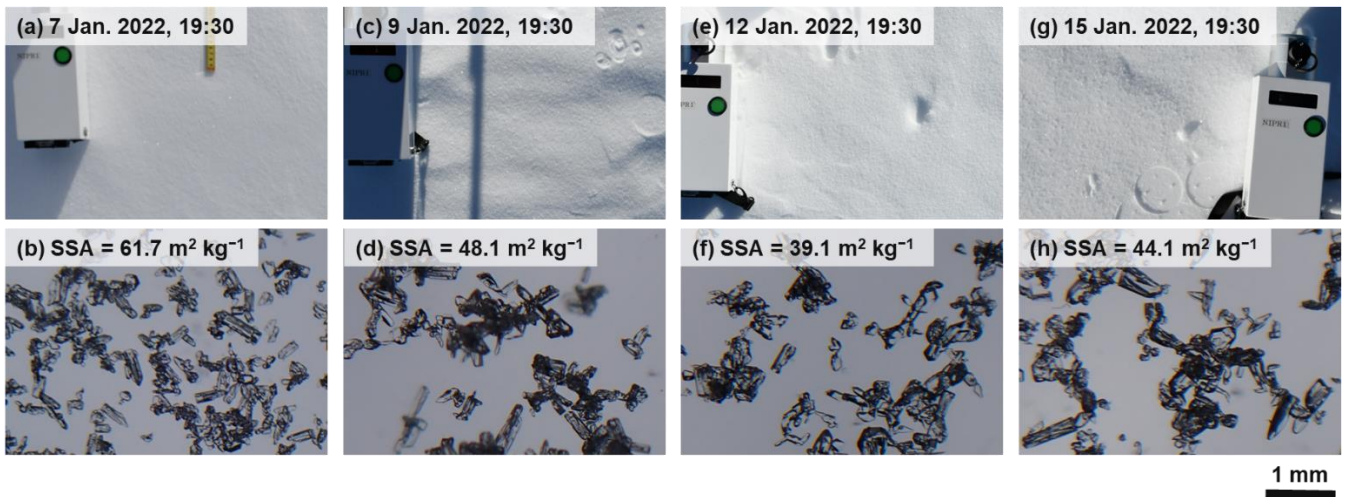

100

**Figure S5:** Photographs of the surface at Dome Fuji with HISSGraS on the surface and snow crystals. (a, b) 19:30 LT on 7 January, (c, d) 19:30 LT on 9 January, (e, f) 19:30 LT on 12 January, and (g, h) 19:30 LT on 15 January 2022. Circular marks on the surface are traces made by pressing the glass window in front of HISSGraS.

## 105 References

- Aoki, T., Hachikubo, A., Nishimura, M., Hori, M., Niwano, M., Tanikawa, T., Sugiura, K., Inoue, R., Yamaguchi, S., Matoba, S., Shimada, R., Ishimoto, H., and Gallet, J.-C.: Development of a handheld integrating sphere snow grain sizer (HISSGraS), *Ann. Glaciol.*, 1–12, <https://doi.org/10.1017/aog.2023.72>, 2023.
- Arioli, S., Picard, G., Arnaud, L., and Favier, V.: Dynamics of the snow grain size in a windy coastal area of Antarctica from continuous in situ spectral-albedo measurements, *The Cryosphere*, 17, 2323–2342, <https://doi.org/10.5194/tc-17-2323-2023>, 2023.
- Arnaud, L., Picard, G., Champollion, N., Domine, F., Gallet, J. C., Lefebvre, E., Fily, M., and Barnola, J. M.: Measurement of vertical profiles of snow specific surface area with a 1 cm resolution using infrared reflectance: instrument description and validation, *J. Glaciol.*, 57, 17–29, <https://doi.org/10.3189/002214311795306664>, 2011.
- 115 Brucker, L., Picard, G., Arnaud, L., Barnola, J.-M., Schneebeli, M., Brunjail, H., Lefebvre, E., and Fily, M.: Modeling time series of microwave brightness temperature at Dome C, Antarctica, using vertically resolved snow temperature and microstructure measurements, *J. Glaciol.*, 57, 171–182, <https://doi.org/10.3189/002214311795306736>, 2011.
- Calonne, N., Montagnat, M., Matzl, M., and Schneebeli, M.: The layered evolution of fabric and microstructure of snow at Point Barnola, Central East Antarctica, *Earth Planet. Sci. Lett.*, 460, 293–301, <https://doi.org/10.1016/j.epsl.2016.11.041>, 2017.
- 120 Carlsen, T., Birnbaum, G., Ehrlich, A., Freitag, J., Heygster, G., Istomina, L., Kipfstuhl, S., Orsi, A., Schäfer, M., and Wendisch, M.: Comparison of different methods to retrieve optical-equivalent snow grain size in central Antarctica, *The Cryosphere*, 11, 2727–2741, <https://doi.org/10.5194/tc-11-2727-2017>, 2017.
- 125 Gallet, J.-C., Domine, F., Arnaud, L., Picard, G., and Savarino, J.: Vertical profile of the specific surface area and density of the snow at Dome C and on a transect to Dumont D’Urville, Antarctica – albedo calculations and comparison to remote sensing products, *The Cryosphere*, 5, 631–649, <https://doi.org/10.5194/tc-5-631-2011>, 2011.
- Gallet, J.-C., Domine, F., Savarino, J., Dumont, M., and Brun, E.: The growth of sublimation crystals and surface hoar on the Antarctic plateau, *The Cryosphere*, 8, 1205–1215, <https://doi.org/10.5194/tc-8-1205-2014>, 2014.
- 130 Hersbach, H., Bell, B., Berrisford, P., Hirahara, S., Horányi, A., Muñoz-Sabater, J., Nicolas, J., Peubey, C., Radu, R., Schepers, D., Simmons, A., Soci, C., Abdalla, S., Abellan, X., Balsamo, G., Bechtold, P., Biavati, G., Bidlot, J., Bonavita, M., De Chiara, G., Dahlgren, P., Dee, D., Diamantakis, M., Dragani, R., Flemming, J., Forbes, R., Fuentes, M., Geer, A., Haimberger, L., Healy, S., Hogan, R. J., Hólm, E., Janisková, M., Keeley, S., Laloyaux, P., Lopez, P., Lupu, C., Radnoti, G., de Rosnay, P., Rozum, I., Vamborg, F., Villaume, S., and Thépaut, J.-N.: The ERA5 global reanalysis, *Q. J. Roy. Meteorol. Soc.*, 146, 1999–2049, <https://doi.org/10.1002/qj.3803>, 2020.
- Hörhold, M. W., Albert, M. R., and Freitag, J.: The impact of accumulation rate on anisotropy and air permeability of polar firn at a high-accumulation site, *J. Glaciol.*, 55, 625–630, <https://doi.org/10.3189/002214309789471021>, 2009.
- 140 Inoue, R., Fujita, S., Kawamura, K., Oyabu, I., Nakazawa, F., Motoyama, H., and Aoki, T.: Spatial distribution of vertical density and microstructure profiles in near-surface firn around Dome Fuji, Antarctica, *The Cryosphere*, 18, 425–449, <https://doi.org/10.5194/tc-18-425-2024>, 2024.
- Leduc-Leballeur, M., Picard, G., Mialon, A., Arnaud, L., Lefebvre, E., Possenti, P., and Kerr, Y.: Modeling L-Band Brightness Temperature at Dome C in Antarctica and Comparison With SMOS Observations, *IEEE Trans. Geosci. Remote Sens.*, 53, 4022–4032, <https://doi.org/10.1109/TGRS.2015.2388790>, 2015.
- 145 Libois, Q., Picard, G., Arnaud, L., Morin, S., and Brun, E.: Modeling the impact of snow drift on the decameter-scale variability of snow properties on the Antarctic Plateau, *J. Geophys. Res. Atmos.*, 119, 11662–11681, <https://doi.org/10.1002/2014JD022361>, 2014.

- Libois, Q., Picard, G., Arnaud, L., Dumont, M., Lafaysse, M., Morin, S., and Lefebvre, E.: Summertime evolution of snow specific surface area close to the surface on the Antarctic Plateau, *The Cryosphere*, 9, 2383–2398, <https://doi.org/10.5194/tc-9-2383-2015>, 2015.
- Linow, S., Hörhold, M. W., and Freitag, J.: Grain-size evolution of polar firn: a new empirical grain growth parameterization based on X-ray microcomputer tomography measurements, *J. Glaciol.*, 58, 1245–1252, <https://doi.org/10.3189/2012JoG11J256>, 2012.
- 155 Picard, G., Royer, A., Arnaud, L., and Fily, M.: Influence of meter-scale wind-formed features on the variability of the microwave brightness temperature around Dome C in Antarctica, *The Cryosphere*, 8, 1105–1119, <https://doi.org/10.5194/tc-8-1105-2014>, 2014.
- Picard, G., Libois, Q., Arnaud, L., Verin, G., and Dumont, M.: Development and calibration of an automatic spectral albedometer to estimate near-surface snow SSA time series, *The Cryosphere*, 10, 1297–1316, <https://doi.org/10.5194/tc-10-1297-2016>, 2016.
- 160 Picard, G., Löwe, H., Domine, F., Arnaud, L., Larue, F., Favier, V., Le Meur, E., Lefebvre, E., Savarino, J., and Royer, A.: The Microwave Snow Grain Size: A New Concept to Predict Satellite Observations Over Snow-Covered Regions, *AGU Adv.*, 3, e2021AV000630, <https://doi.org/10.1029/2021AV000630>, 2022.
- Pirazzini, R., Räisänen, P., Vihma, T., Johansson, M., and Tastula, E.-M.: Measurements and modelling of snow particle size and shortwave infrared albedo over a melting Antarctic ice sheet, *The Cryosphere*, 9, 2357–2381, <https://doi.org/10.5194/tc-9-2357-2015>, 2015.
- 165 Proksch, M., Löwe, H., and Schneebeli, M.: Density, specific surface area, and correlation length of snow measured by high-resolution penetrometry, *J. Geophys. Res. Earth Surf.*, 120, 346–362, <https://doi.org/10.1002/2014JF003266>, 2015.
