# Supplementary material for: Spatiotemporal variation in the specific surface area of surface snow measured along the traverse route from the coast to Dome Fuji, Antarctica
Source: Copernicus journal article supplement (doi:10.5194/egusphere-2024-769), 2024-03-25
Supplement: Supplementary file [file egusphere-2024-769-AC1-supplement.pdf]

The authors would like to thank Martin Schneebeli for acknowledging the value of our study and providing valuable feedback on our manuscript. We addressed all of your comments. Our responses are provided in blue, and the revised parts of the manuscript are marked in red.

Reviewer #1: Martin Schneebeli

5 The authors describe and discuss detailed measurements of surface snow SSA in East Antarctica. The methods are described in detail and reproducible. This dataset may serve as ground truth validation for optical remote sensing. The sensor measures the surface (a few millimetres of the snowpack). The repeat measurements on the 1000 km traverses with very high spatial resolution illustrate the complexity of the snow surface in Antarctica.

10 The surface reflectivity is certainly the most important factor in albedo calculations. However, the very small penetration depth of light at 1320 nm into snow is also a limitation in the albedo calculation, as the visible and short near-infrared wavelength backscattering also occurs deeper into the snowpack. This should be clarified in more detail in this paper and discussed.

[A01] We will clarify the limitation in albedo calculations, by estimating uncertainties in broadband albedo calculated using a physically based snow albedo model (Aoki et al., 2011). The estimated uncertainty will be mentioned in Sect. 2.2.1 (see below). Since albedo calculations are beyond the scope of this study, the detailed scheme of the calculation will be described and discussed in the Supplementary Note (see below).

20 Sect. 2.2.1

"We used HISSGraS for SSA measurements, which shares *a similar measurement principle as IceCube (Gallet et al., 2009) but offers advantages such as being lightweight, handheld, and capable of directly measuring snow surfaces without the need for sampling (Aoki et al., 2023). It employs an integrating sphere, the circular part of which (25 mm diameter) is a glass window. Inside, a laser diode and an InGaAs photodiode are attached. The laser diode emits NIR light at 1310 nm through the glass window, which is in direct contact with the snow surface, and ~~The penetration depth—the depth at which the light intensity reduces to  $e^{-1}$  of its incident value—for NIR light at 1310 nm is approximately 8 mm for fresh snow and 9 mm for depth hoar with a SSA of 40 and  $12 \text{ m}^2 \text{ kg}^{-1}$  and a density of 120 and  $230 \text{ kg m}^{-3}$ , respectively (Gallet et al., 2011). Therefore, HISSGraS provides a weighted average of the snow SSA—over approximately the top 10 mm of near surface snow (referred to hereafter as "surface snow-SSA") (Aoki et al., 2011)—the InGaAs photodiode collects the light reflected by the snow surface. The measured light intensity is then converted to reflectance (R) using a calibration curve derived from the measurements on six reflectance standards (5–99%). Since the calibration curve varies with ambient temperature due to the temperature sensitivity of the laser diode emission ( $-1\% \text{ K}^{-1}$ ), HISSGraS records the temperature close to the laser diode for every light intensity measurement, enabling the correction for the temperature dependence of calibration curves. Following Aoki et al. (2023), we constructed a~~*

calibration formula applicable to the temperature range observed during our study ( $-35$  to  $5^{\circ}\text{C}$ ) (see Supplementary Note S1 and Fig. S1 for details). Finally, the calibrated  $R$  is converted to SSA using a theoretical  $R$ –SSA relationship derived from a radiative transfer model that assumes spherical snow grains and employs Mie theory (Aoki et al., 1999).

The penetration depth – the depth at which the light intensity reduces to  $e^{-1}$  of its incident value – for NIR light at  $1310$  nm is approximately  $8$  mm for fresh snow and  $9$  mm for Antarctic depth hoar with a SSA of  $40$  and  $12$   $\text{m}^2$   $\text{kg}^{-1}$  and a density of  $120$  and  $230$   $\text{kg}$   $\text{m}^{-3}$ , respectively (Gallet et al., 2011).

Therefore, HISSGraS provides a weighted average of the snow SSA over approximately the top  $10$  mm of near-surface snow (referred to hereafter as "surface snow SSA"). The SSA measured with HISSGraS for the depths enables broadband albedo calculations with an uncertainty of  $0.03$  in the Antarctic inland, despite the deeper penetration of visible and short near-infrared wavelengths into the snowpack, according to a physically based snow albedo model (see Supplementary Note S2 and Fig. S2)."

## Supplementary Note S2

"Note S2: Potential error in broadband albedo derived from HISSGraS measurement

To evaluate the potential error in broadband albedo derived from the surface snow grain size measured with HISSGraS, we compared the albedo values calculated for a snow layer with homogeneous snow grain size to those calculated when the snow grain size of the subsurface layer differs from the surface layer. Broadband albedos were calculated using a physically based snow albedo model (Aoki et al., 2011), which assumes two snow layers. The snow grain shape employed was a spherical particle model, with radii (SSA) in the two snow layers set at  $50$   $\mu\text{m}$  ( $65.4$   $\text{m}^2$   $\text{kg}^{-1}$ ),  $200$   $\mu\text{m}$  ( $16.4$   $\text{m}^2$   $\text{kg}^{-1}$ ), and  $1000$   $\mu\text{m}$  ( $3.3$   $\text{m}^2$   $\text{kg}^{-1}$ ), representing average snow grain radii for new snow, fine-grained old snow, and old snow near the melting point, respectively (Wiscombe and Warren, 1980). The thickness of the top layer was assumed to be the critical snow depth (CSD) for monochromatic albedo at  $1310$  nm, the laser wavelength of the HISSGraS. The CSD is defined as the depth at which the monochromatic albedo at this wavelength closely approximates (assumed to be  $99\%$  in this study) the albedo of a semi-infinitely thick snow layer and no longer depends on the snow grain size in deeper layers. For a snow density of  $200$   $\text{kg}$   $\text{m}^{-3}$ , the CSD values are  $8.3$  mm,  $21.1$  mm, and  $37.1$  mm for snow grain radii ( $r_s$ ) of  $50$ ,  $200$ , and  $1000$   $\mu\text{m}$ , respectively. The thickness of the bottom layer in the two-layer snow model was assumed to be semi-infinite. Snow contamination is held constant at a concentration of  $1.0$   $\text{ng}$   $\text{L}^{-1}$  black carbon across all snow layers, based on in-situ measurements along the route from S16 to Mizuho (Kinase et al., 2020). The atmospheric conditions include assumptions of both clear sky and cloudy sky. Considering that the solar zenith angle ( $\theta_0$ ) at local solar noon on the summer solstice is  $44.5^{\circ}$  and  $54.0^{\circ}$  at S16 and Dome Fuji, respectively, we calculated the broadband albedos for  $\theta_0 > 45^{\circ}$ .

Figure S2 presents the simulated broadband albedo under clear sky (Fig. S2a) and cloudy sky (Fig. S2b) conditions for various combinations of three types of  $r_s$  across the two snow layers. When the  $r_s$  values in the two snow layers are the same and correspond to the HISSGraS measurement, the simulated broadband albedo corresponds with that expected from the HISSGraS measurement. When the  $r_s$  values differ between the top and bottom layers, the potential variability in broadband albedos for each  $r_s$  in the top layer is calculated. The difference in albedo between cases where the snow grain size is the same and differs between the two snow layers represents a potential error in the broadband albedo estimated from the surface snow grain size measured with the HISSGraS. The maximum estimated error is  $0.05$  when the

80

$r_s$  of the top and bottom layers are 1000  $\mu\text{m}$  and 50  $\mu\text{m}$ , respectively, at  $\theta_0 = 45^\circ$  under clear sky conditions. This error remains consistent across all  $\theta_0$  under cloudy conditions. In this study, the surface snow SSA measured with HISSGraS in Antarctica predominantly falls within the range of 50  $\mu\text{m}$  to 200  $\mu\text{m}$  (Fig. 7). For this range, the estimated maximum error is 0.03 when the  $r_s$  for the top and bottom layers are 50  $\mu\text{m}$  and 1000  $\mu\text{m}$ , respectively, under the same  $\theta_0$  conditions."

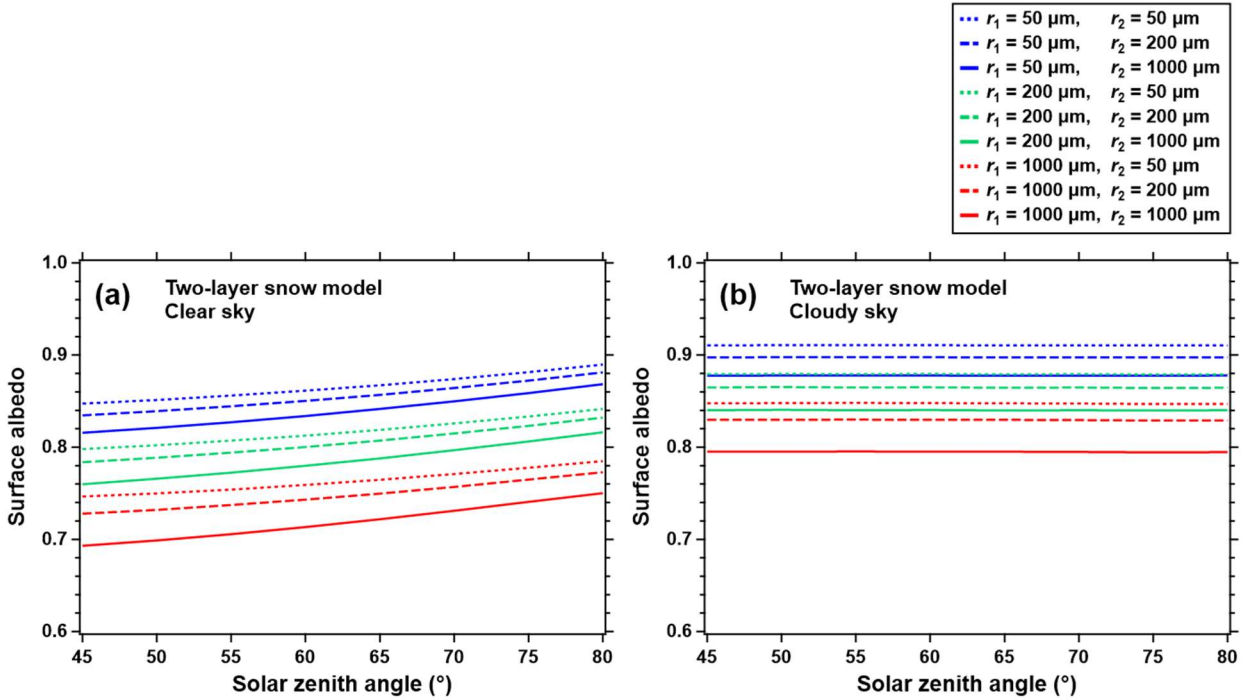

85

**Figure S2: Theoretically calculated broadband albedos under (a) clear sky and (b) cloudy sky for the combination of  $r_s = 50, 200,$  and  $1000 \mu\text{m}$  in the two-layer snow model as a function of  $\theta_0$  simulated with a physically based snow albedo model.**

90

Finally, we will note the necessity of SSA data at deeper depths for more accurate albedo calculations in L621–623 in the original manuscript: "Our insights into the crucial processes controlling the spatial variation of surface snow SSA will contribute to improving the parameterization of snow SSA in climate models (e.g., Flanner and Zender, 2006). Further investigation of SSA at deeper depths in the top few tens of centimeters, along with snow grain shape analysis for the calculations of bidirectional reflectance distribution function necessary for satellite albedo retrievals (e.g., Ishimoto et al., 2018; Robledano et al., 2023), would be desirable for better constraining present and future changes in surface albedo in Antarctica."

95

I was also missing measurements of any snow impurities. Known to be small, they may not be negligible, especially in the coastal region, and could contribute to an altered albedo.

[A02] Recently, the mass concentration of black carbon, a significant light-absorbing impurity, in the snow has been measured along a traverse route from Syowa Station to Mizuho, showing a maximum of

100  $1.2 \times 10^{-3}$  ppm (Kinase et al., 2020). According to broadband albedo simulations as a function of black carbon, this concentration level has little effect on albedo (e.g., see Fig. 3 in Aoki et al., 2011).

We will cite these studies and modify L36 in the original manuscript to "*For example, the SSA is an important snow physical parameter for surface albedo. Near-infrared albedo strongly depends on snow grain size, while visible albedo is more influenced by the concentrations of light-absorbing impurities (Warren and Wiscombe, 1980; Wiscombe and Warren, 1980; Aoki et al., 2011). In Antarctica, the impurity concentration is low enough not to affect albedo (Grenfell et al., 1994; Warren et al., 2006; Kinase et al., 2020). The snow thickness affecting albedo is the top few tens of centimeters because light penetration depth ranges from several millimeters at near-infrared wavelengths to several tens of centimeters at visible wavelengths (Zhou et al., 2003). Therefore, the SSA in the top few tens of centimeters is a key determinant for surface albedo in Antarctica.*"

105  
110

The manuscript is a very important contribution to a better understanding of the antarctic snowpack and its interaction with short-wave radiation.

[A03] Thank you for recognizing the value of this study.

For directional reflectance calculations, the snow particle shape is important. Robledano et al. 2023 demonstrate that snow grain shape is an important factor in BRDF-calculations, which are necessary for satellite albedo retrievals. Could the author also record the snow particle shape together with their instrumental observations?

115

[A04] Thank you for informing us of the related study. Unfortunately, we were unable to record the detailed snow grain shape for all observed surfaces due to time constraints (microscopic photographs of snow grains were obtained for approximately 1/4 of the surfaces, and some of these were referred to identify snow grain shape).

120

We will mention the importance of snow grain shape for albedo constraints in L621–623 in the original manuscript; "*Our insights into the crucial processes controlling the spatial variation of surface snow SSA will contribute to improving the parameterization of snow SSA in climate models (e.g., Flanner and Zender, 2006). Further investigation of SSA in the top few tens of centimeters, along with snow grain shape analysis for the calculations of bidirectional reflectance distribution function necessary for satellite albedo retrievals (e.g., Ishimoto et al., 2018; Robledano et al., 2023), would be desirable for better constraining present and future changes in surface albedo in Antarctica.*"

125

The authors mention the potential of these measurements to be used for satellite remote sensing validation. However, there are no temporally coincident optical satellite passes mentioned, so will the large spatial and temporal variability of the surface snow SSA allow later for a direct comparison?

130

[A05] We checked when satellites, capable of retrieving surface snow SSA, passed over the observation area. Terra passed within 6:00–10:00 LT during our traverses, and Aqua within 15:00–18:00 LT. The observations at Dome Fuji were scheduled to coincide with these times. Some observations during traverses were conducted outside these times. However, since temporal changes in SSA are minimal at low temperatures (e.g., SSA decreases only from  $40 \text{ m}^2 \text{ kg}^{-1}$  to  $38 \text{ m}^2 \text{ kg}^{-1}$  over 5 hours at  $-10^\circ\text{C}$ ;

135

Talandier et al., 2007) except during and immediately after snowfall, SSA measurements taken a few hours before and after satellite passes allow later for a comparison with satellite retrievals.

140 We will modify L171 in the original text to "*Additionally, we performed the activity twice daily (around 8:00 and 20:00 LT, close to the time when Terra and Aqua satellites pass Dome Fuji) at a fixed location near Dome Fuji Station from 5 to 17 January to track the temporal variation of SSA.*"

For additional manuscript revision, see [A09] of this file.

The authors nicely illustrate the observed trends and spatial variability in Fig. 7. In table 2, it would be interesting to see if the differences between the Regions are significant.

145 [A06] We will modify L416–420 to "*Aged deposition and erosion surfaces show similar SSA in each region (Table 2) but predominantly appear in the inland plateau and coastal regions, respectively. Both surfaces show a significant increase in SSA toward the interior, exceeding their SDs (Table 2). Sastrugi, primarily observed in the lower katabatic wind region ( $25 \pm 7 \text{ m}^2 \text{ kg}^{-1}$ ), shows similar SSA to erosion surfaces ( $25 \pm 8 \text{ m}^2 \text{ kg}^{-1}$ ). Glazed surfaces, primarily observed in the katabatic wind region, show the*

150 *lowest SSA ( $19 \pm 4 \text{ m}^2 \text{ kg}^{-1}$ ) among the five surface morphologies, with similar values within the SD across the four regions (Table 2).*"

Significance assessment for fresh deposition surfaces and sastrugi is refrained due to the limited number of observed surfaces in many of the four regions.

155 There is always a temperature gradient in the snowpack in Antarctica, so isothermal metamorphism is not relevant. The reviewer suggests that more weight is put on temperature gradients and not absolute temperature.

[A07] We acknowledge that there is always a temperature gradient in the top few meters of Antarctic firn. We will put more weight on temperature gradient metamorphism (not isothermal metamorphism) in Sect. 4.1 (see below). We also think that the effect of absolute temperature on temperature gradient metamorphism should not be ignored because it significantly influences the amount of saturated water vapor and, hence, the rate of snow metamorphism. Evidentially, the snow metamorphism experiments have shown the non-negligible dependence of SSA decay rate (or grain growth rate) on absolute temperature (between  $-20$  and  $-4$  °C) even under temperature gradient conditions between  $8$  and  $54$  °C  $\text{m}^{-1}$  (Marbouty, 1980; Taillandier et al., 2007). Also, seasonal variations in surface snow SSA during

160 summer may support this temperature dependence of the SSA decay rate (Libois et al., 2015). Thus, we believe that the temperature dependence of our SSA data is worth discussing.

165

Sect. 4.1

"We discuss whether the temperature dependence of dry snow metamorphism can explain the observed non-linear relationship between air temperature and SSA. The curves in Fig. 8 are modeled SSA of snow after undergoing metamorphism for 3, 10, 30, and 50 days under temperature gradient (solid lines) and isothermal (dashed lines) conditions. These were calculated using two empirical SSA decay formulas for temperature gradients between  $8$  and  $54$  °C  $\text{m}^{-1}$  and temperatures between  $-20$  and  $-4$  °C and for temperatures between  $-15$  and  $-4$  °C without gradient, respectively (Taillandier et al., 2007), as a

170 function of temperature and an initial SSA of  $90 \text{ m}^2 \text{ kg}^{-1}$  (the mean SSA of precipitation particles at event

175

C, Fig. 3f). SSA decreases more slowly under isothermal conditions than under temperature gradient conditions, expecting approximately 50 days of snow metamorphism without burial for the observed surfaces in the higher temperature range ( $\sim -15$  to  $0$  °C). Such a prolonged accumulation hiatus seems unrealistic, considering frequent accumulation due to offshore cyclones near the coast of the traverse route (Takahashi et al., 1994; Watanabe, 1978). Thus, temperature gradient metamorphism may better explain SSA decrease in surface snow (the top  $\sim 10$  mm) in the Antarctica inland. The model for temperature gradient conditions offers a robust depiction of the temperature dependence of SSA for metamorphosed snow, although accurately assessing the duration of snow metamorphism for the observed surfaces based on the model is still difficult because the model assumes constant temperature while the observed SSA results from varying temperatures and because it does not incorporate temperature gradient as a variable (the potential effect of temperature gradient on the spatial SSA variations is discussed in Sect. 4.5). The modeled temperature dependence is almost linear, with linear regression slopes for the 3- and 50-day curves between  $-35$  and  $0$  °C being  $-1.05$  and  $-0.27$   $m^2$   $kg^{-1}$   $^{\circ}C^{-1}$ , respectively. The range of these slopes covers that derived from all the 10-surface mean SSA data,  $-0.95 \pm 0.10$   $m^2$   $kg^{-1}$   $^{\circ}C^{-1}$  (red line in Fig. 8), suggesting a primary role of air (or snow) temperature in controlling the spatial variation of surface snow SSA along the traverse route. However, the modeled linear temperature dependence does not explain the observed non-linear relationship between air temperature and SSA. Therefore, additional factors must also influence the spatial variation of SSA. These are discussed in the following sections.

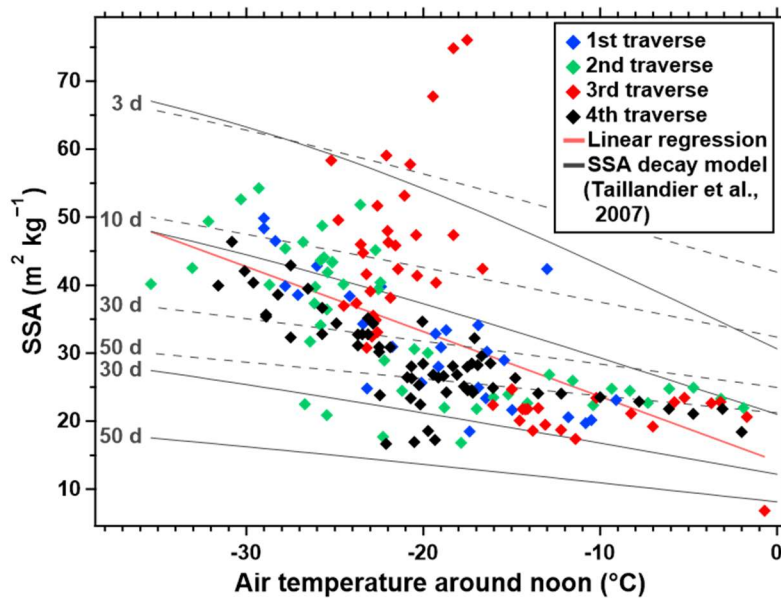

Figure 8: Relationship between the 10-surface mean SSA at each observation site and air temperature around noon measured during the four traverses. Air temperatures for sites without measurement around noon are interpolated between the available data along the distance from the coast (Fig. 6b). The red line indicates the linear regression for the 10-surface mean SSA. The grey curves indicate SSA of snow metamorphosed for 3, 10, 30, and 50 days under temperature gradient (solid lines) and

*isothermal (dashed lines) conditions, calculated using an empirical SSA decay model (Taillandier et al., 2007), with an initial SSA of 90 m<sup>2</sup> kg<sup>-1</sup>."*

We also emphasize the need for further study on the effect of temperature gradients on the observed spatial SSA variations in Sect. 4.5 (see below). To our knowledge, quantitatively assessing the impact of the magnitude and frequency of temperature gradients on SSA decrease at the surface in Antarctica is currently challenging due to the lack of knowledge about spatiotemporal temperature gradient variations in the top ~10 mm across the traverse route, where wind ventilation and penetration of insolation into the firn complicate temperature gradients.

Sect. 4.5

*"Wind-driven sublimation and condensation in snow (e.g., Albert, 2002; Ebner et al., 2016) may facilitate snow metamorphism, particularly in the coastal and katabatic wind regions (see Fig. 9b). Additionally, the magnitude and frequency of temperature gradients in the top few centimeters, which is not parameterized in the SSA decay model (Taillandier et al., 2007), is important for snow metamorphism. In fact, the model underestimates the observed SSA decay rate during 27–29 December when SSA decreases from 60–110 to 35–55 m<sup>2</sup> kg<sup>-1</sup> within 2 days at around –20°C whereas the model estimates 3–15 days for this decrease (Fig. 8). This discrepancy may arise because the actual temperature gradient within 10 mm of the surface is stronger (e.g., exceeding 100°C m<sup>-1</sup>, (Azuma et al., 1997)) than the conditions on which the empirical model is based, suggesting essential role of large temperature gradients in spatial SSA variations. The magnitude and frequency of the temperature gradient may vary along the traverse route and produce differences in the SSA decay rate. For example, the temperature gradient possibly increases toward the interior due to increasing diurnal air temperature variations (see Figs. 4 and S3) or decreasing wind speed that diffuses heat within the snow (Fig. 9b), which may facilitate snow metamorphism more in the inland plateau region than in the katabatic wind and coastal regions. Assessing the impact of wind ventilation and temperature gradient on the spatial variation of surface snow SSA requires further quantitative understanding of the relationship between the wind speeds (or the magnitude and frequency of temperature gradients) and SSA decay rate. It is also necessary to understand temperature gradient variations in the top few centimeters across Antarctica where wind ventilation and penetration of insolation into the firn may complicate temperature gradients."*

Title: "Spatiotemporal" implicitly suggests that the measurements are during an entire year. I suggest as title "Spatial variation ... during austral summer"

[A08] We agree with your suggestion and will change the title to "*Spatial variation in the specific surface area of surface snow measured along the traverse route from the coast to Dome Fuji, Antarctica, during austral summer.*"

25: "enable the validation ..." this is not shown in greater detail in the paper

[A09] SSA retrievals from e.g., the MODIS sensor at 860, 1240, and 1640 nm on the Terra and Aqua

satellites can be compared with our in-situ data (particularly directly at 1240 nm) (see also [A05])

240 We will revise L66 in the manuscript to "*Algorithms for retrieving the SSA of near-surface snow using near-infrared (NIR) imagery data at 860, 1240, and 1640 nm, such as from the moderate resolution imaging spectroradiometer (MODIS) onboard Terra and Aqua satellites, or microwave data have been developed and applied to Antarctica*".

245 We will modify L620 to "*Our dataset provides abundant ground-truth SSA data for validating satellite-derived SSA variations across Antarctica, such as from Terra and Aqua MODIS data (Scambos et al., 2007; Jin et al., 2008; Kokhanovsky et al., 2011), Ocean and Land Colour Instrument (OLCI) onboard Sentinel-3A/B (Kokhanovsky et al., 2019) and Second-Generation Global Imager (SGLI) onboard Global Change Observation Mission–Climate (GCOM-C) (Hori et al., 2018).*"

Detailed validation is beyond the scope of this study.

43 ff: The isothermal case does not exist in Antarctica, and can be deleted here (or then the newer papers by Kaempfer et al, Calonne et al must be cited and commented.

[A10] We will delete the sentences related to isothermal metamorphism.

54: the sentence "In addition ..." is not relevant in the context of this paper

[A11] We will remove the sentence.

75: ASSSAP was mainly used in Antarctica: I suggest to delete "alpine"

255 [A12] We will remove "alpine".

176: "shares the same measurement principle ..." replace by " shares a similar measurement principle ..."

[A13] We will replace it.

203: "... with the accurate ..." there is quite a large measurement uncertainty by the methane absorption method, give precision in text

260 [A14] We will remove the word "accurate" and add the accuracy of 12% (Legagneux et al., 2002) in L203 in the original text.

249: You could mention here that the measurements are during austral summer, and not spring, autumn and winter

265 [A15] We will modify the part to "*We describe the spatial variation of surface snow SSA measured during the four traverses between S16 and Dome Fuji in the austral summer and ...*"

323: meteorological events are by definition short-term. Delete "short-term".

[A16] We will remove the term "short-term" from "short-term meteorological events" throughout the manuscript.



431: I think it's interesting that glazed surfaces do not always lead to a very high variability?  
270 [A17] If glazed surfaces predominate at a site, the SSA variability of 10 surfaces is not so high, which, I think, is what you refer to. The phrase might be confusing, and we will modify L418–420 in the original manuscript to "*The appearance of various surface morphologies including glazed surfaces results in higher SSA variability compared to the coastal and inland plateau regions (Table 1)*".

453: the magnitude and frequency of temperature gradients are much more important than absolute  
275 temperature  
[A18] The importance of the magnitude and frequency of temperature gradients in SSA will be more emphasized in Sects. 4.1 and 4.5 (refer to [A07] of this file)

599: "under high pressure." there could also be clear days without high atmospheric pressure.  
[A19] We will remove "under high pressure".

280 References:

Aoki, T., Kuchiki, K., Niwano, M., Kodama, Y., Hosaka, M., and Tanaka, T.: Physically based snow albedo model for calculating broadband albedos and the solar heating profile in snowpack for general circulation models, *J. Geophys. Res. Atmos.*, 116, D11114, <https://doi.org/10.1029/2010JD015507>, 2011.

285 Azuma, N., Kameda, T., Nakayama, Y., Tanaka, Y., Yoshimi, H., Furukawa, T., and Ageta, Y.: Glaciological data collected by the 36th Japanese Antarctic Research Expedition during 1995-1996, JARE data reports. *Glaciology*, 26, 1–83, <https://doi.org/10.15094/00004956>, 1997.

Grenfell, T. C., Warren, S. G., and Mullen, P. C.: Reflection of solar radiation by the Antarctic snow surface at ultraviolet, visible, and near-infrared wavelengths, *J. Geophys. Res. Atmos.*, 99, 18669–18684, <https://doi.org/10.1029/94JD01484>, 1994.

290 Hori, M., Murakami, H., Miyazaki, R., Honda, Y., Nasahara, K., Kajiwara, K., Nakajima, T. Y., Irie, H., Toratani, M., Hirawake, T., and Aoki, T.: GCOM-C Data Validation Plan for Land, Atmosphere, Ocean, and Cryosphere, *Trans. JSASS Aerospace Tech. Japan*, 16, 218–223, <https://doi.org/10.2322/tastj.16.218>, 2018.

295 Ishimoto, H., Adachi, S., Yamaguchi, S., Tanikawa, T., Aoki, T., and Masuda, K.: Snow particles extracted from X-ray computed microtomography imagery and their single-scattering properties, *J. Quant. Spectrosc. Radiat. Transfer*, 209, 113–128, <https://doi.org/10.1016/j.jqsrt.2018.01.021>, 2018.

Kinase, T., Adachi, K., Oshima, N., Goto-Azuma, K., Ogawa-Tsukagawa, Y., Kondo, Y., Moteki, N., Ohata, S., Mori, T., Hayashi, M., Hara, K., Kawashima, H., and Kita, K.: Concentrations and Size Distributions

- of Black Carbon in the Surface Snow of Eastern Antarctica in 2011, *J. Geophys. Res. Atmos.*, 125, e2019JD030737, <https://doi.org/10.1029/2019JD030737>, 2020.
- 300 Kokhanovsky, A., Rozanov, V. V., Aoki, T., Odermatt, D., Brockmann, C., Krüger, O., Bouvet, M., Drusch, M., and Hori, M.: Sizing snow grains using backscattered solar light, *Int. J. Remote Sens.*, 32, 6975–7008, <https://doi.org/10.1080/01431161.2011.560621>, 2011.
- Kokhanovsky, A., Lamare, M., Danne, O., Brockmann, C., Dumont, M., Picard, G., Arnaud, L., Favier, V., Jourdain, B., Le Meur, E., Di Mauro, B., Aoki, T., Niwano, M., Rozanov, V., Korokin, S., Kipfstuhl, S., Freitag, J., Hoerhold, M., Zühr, A., Vladimirova, D., Faber, A.-K., Steen-Larsen, H. C., Wahl, S., Andersen, J. K., Vandecrux, B., van As, D., Mankoff, K. D., Kern, M., Zege, E., and Box, J. E.: Retrieval of Snow Properties from the Sentinel-3 Ocean and Land Colour Instrument, *Remote Sens.*, 11, 2280, <https://doi.org/10.3390/rs11192280>, 2019.
- 305 Marbouty, D.: An Experimental Study of Temperature-Gradient Metamorphism, *J. Glaciol.*, 26, 303–312, <https://doi.org/10.3189/S0022143000010844>, 1980.
- Robledano, A., Picard, G., Dumont, M., Flin, F., Arnaud, L., and Libois, Q.: Unraveling the optical shape of snow, *Nat Commun*, 14, 3955, <https://doi.org/10.1038/s41467-023-39671-3>, 2023.
- Warren, S. G. and Wiscombe, W. J.: A Model for the Spectral Albedo of Snow. II: Snow Containing Atmospheric Aerosols, *J. Atmos. Sci.*, 37, 2734–2745, [https://doi.org/10.1175/1520-0469\(1980\)037<2734:AMFTSA>2.0.CO;2](https://doi.org/10.1175/1520-0469(1980)037<2734:AMFTSA>2.0.CO;2), 1980.
- 315 Warren, S. G., Brandt, R. E., and Grenfell, T. C.: Visible and near-ultraviolet absorption spectrum of ice from transmission of solar radiation into snow, *Appl. Opt.*, AO, 45, 5320–5334, <https://doi.org/10.1364/AO.45.005320>, 2006.
- 320 Zhou, X., Li, S., and Stamnes, K.: Effects of vertical inhomogeneity on snow spectral albedo and its implication for optical remote sensing of snow, *J. Geophys. Res. Atmos.*, 108, <https://doi.org/10.1029/2003JD003859>, 2003.
